# Supplementary material for: Phosphatase and Tensin Homolog Inhibition in Proteolipid Protein 1-Expressing Cells Stimulates Neurogenesis and Gliogenesis in the Postnatal Enteric Nervous System
Source: MDPI journal article supplement (doi:10.3390/biom14030346), 2024-03-13
Supplement: s1 [file s1]

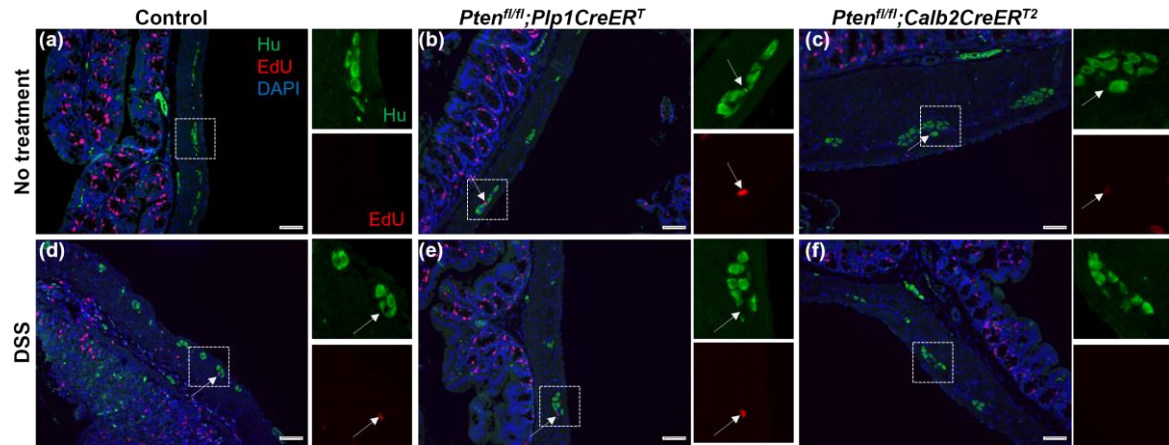

**Supplemental Figure S1.** Hu+ myenteric neurons are not positive for EdU in the colons of mice lacking *Pten* expression in either *Plp1* or *Calb2*-expressing cells. Representative images of Hu (green) and EdU (red) immunofluorescence on colon sections from control (a, d), *Pten<sup>fl/fl</sup>;Plp1CreER<sup>T</sup>* (b, e) and *Pten<sup>fl/fl</sup>;Calb2CreER<sup>T2</sup>* (c, f) mice that received no treatment (a, b, c) and 3-4 days post-DSS (d, e, f). Magnified regions are of myenteric ganglia and are indicated with a white square. Arrows are used to highlight EdU+ cells in the myenteric plexus that are negative for Hu; EdU, 5-ethynyl-2'-deoxyuridine; NT, no treatment; scale bar, 50  $\mu$ m.
